# Supplementary material
Source: Springer Nature journal article supplement (https://www.springermedizin.de/resource/supplementary/12936_2010_1301_MOESM3_ESM.pdf/9549444)
Supplement: MOESM3 [file 9549444]

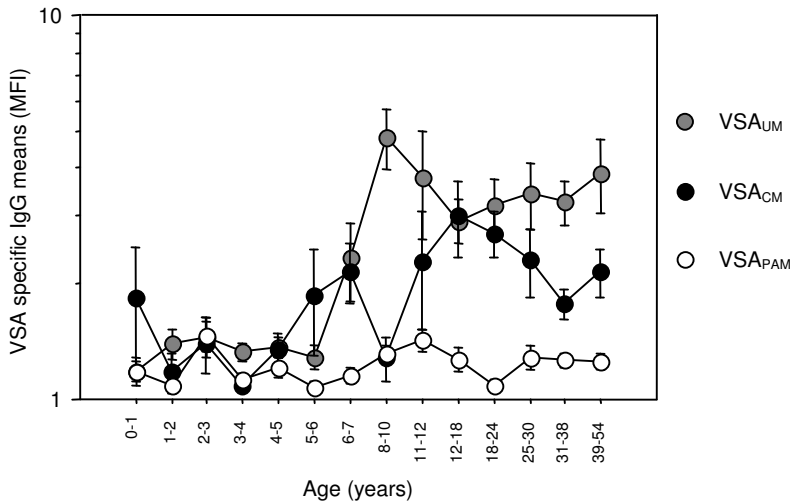

| Donors age groups (yrs) | UM isolates |       |          | CM isolates |       |         | PAM isolates |       |         |
|-------------------------|-------------|-------|----------|-------------|-------|---------|--------------|-------|---------|
|                         | Don. n      | Is. n | Comb.* n | Don. n      | Is. n | Comb. n | Don. n       | Is. n | Comb. n |
| 0-1                     | 4           | 12    | 20       | 4           | 5     | 8       | 4            | 7     | 15      |
| 1-2                     | 5           | 6     | 22       | 5           | 5     | 12      | 5            | 5     | 19      |
| 2-3                     | 8           | 11    | 33       | 7           | 6     | 20      | 8            | 6     | 25      |
| 3-4                     | 6           | 8     | 27       | 6           | 6     | 15      | 6            | 5     | 20      |
| 4-5                     | 10          | 12    | 50       | 10          | 7     | 22      | 10           | 7     | 37      |
| 5-6                     | 5           | 11    | 24       | 5           | 7     | 16      | 5            | 6     | 16      |
| 6-7                     | 16          | 11    | 46       | 12          | 7     | 44      | 15           | 7     | 32      |
| 8-10                    | 28          | 10    | 50       | 20          | 4     | 24      | 27           | 6     | 44      |
| 11-12                   | 12          | 9     | 24       | 8           | 7     | 16      | 11           | 6     | 23      |
| 12-18                   | 13          | 11    | 59       | 9           | 7     | 39      | 9            | 7     | 19      |
| 18-24                   | 11          | 12    | 83       | 11          | 7     | 69      | 4            | 4     | 13      |
| 25-30                   | 14          | 12    | 96       | 14          | 7     | 54      | 6            | 6     | 26      |
| 31-38                   | 16          | 12    | 88       | 16          | 7     | 65      | 13           | 7     | 50      |
| 39-54                   | 11          | 11    | 58       | 11          | 7     | 41      | 10           | 7     | 40      |

\* Don. Donors, Is. Isolates, Comb. Combinations tested.
